# Supplementary material
Source: publisher site journal article supplement (https://en-cdn.bio-protocol.org/attached/file/20181010/Supplementary%20File%201.docx)

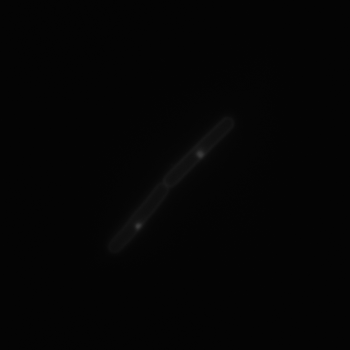


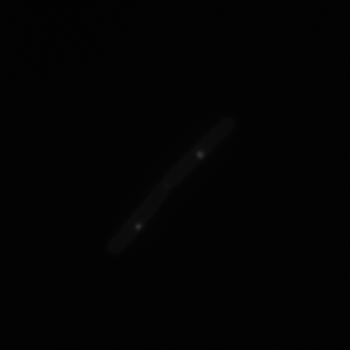

Supplement: Supplementary file 1 [file Supplementary%20File%201.docx]
